# Supplementary material
Source: Springer Nature journal article supplement (https://www.springermedizin.de/resource/supplementary/12879_2013_3671_MOESM8_ESM.pdf/9446412)

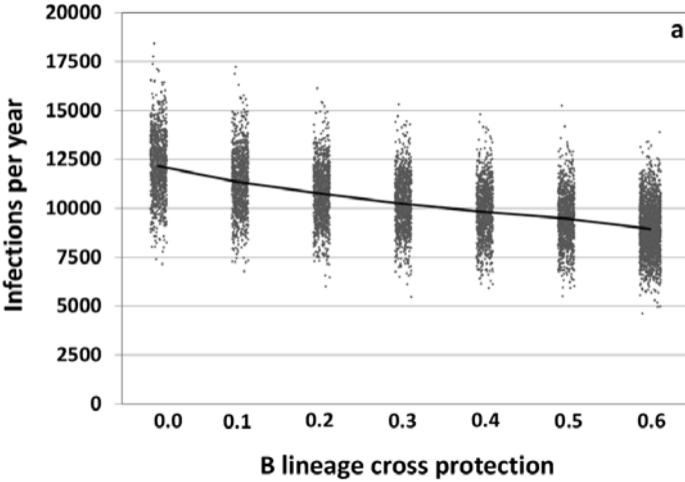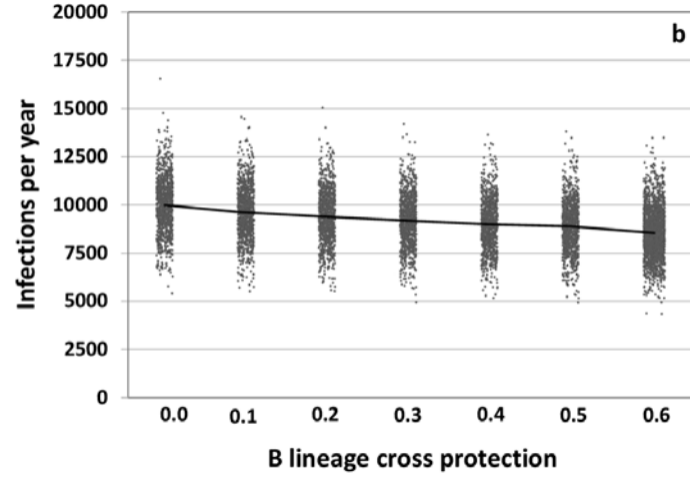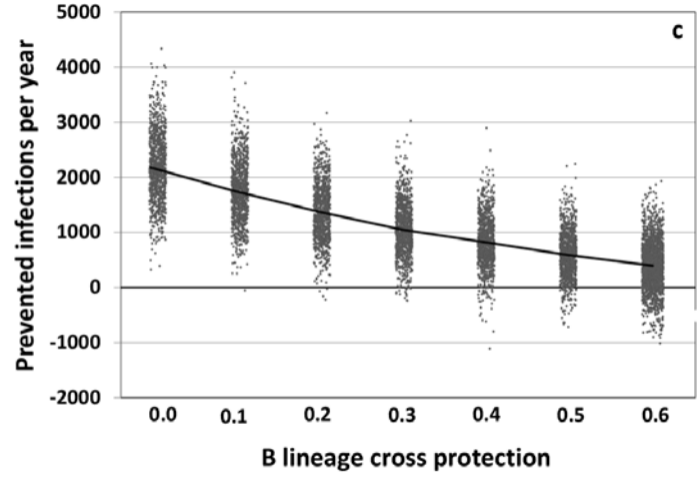

Supplement: MOESM8 [file 9446412]
